# Supplementary material for: Crystallographic and NMR evidence of the unusual N6,N7-didentate chelation of 3-methyladenine coordinated to the cytotoxic α-dichlorobis(2-phenylazopyridine)ruthenium(ii) complex
Source: Royal Society of Chemistry journal article supplement (doi:10.1039/b204665m), 2002-01-01
Supplement: b204665m-2.doc [file b204665m-2.doc]

**Fig. S2**: Intermolecular hydrogen bonding of the NH(6) of one 3-MeAde moiety towards the N9 of another 3-MeAde ligand
